# Supplementary figures and images for: The E3 Ubiquitin Ligase IDOL Induces the Degradation of the Low Density Lipoprotein Receptor Family Members VLDLR and ApoER2
Source: PubMed Central journal article supplement — J Biol Chem. 2010 Apr 28;285(26):19720–6. doi: 10.1074/jbc.M110.123729 (PMC2888382; doi:10.1074/jbc.m110.123729), 2010-04-28

# Supplemental figure S1

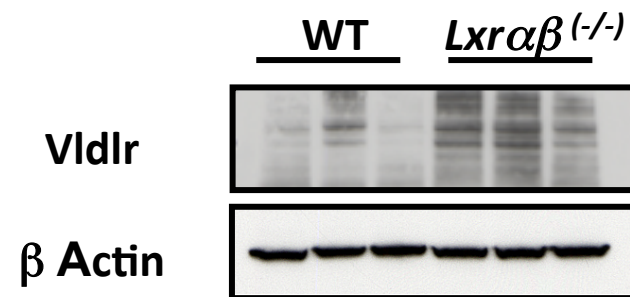

Supplement: supp_M110.123729_jbc.M110.123729-1.pdf [file supp_M110.123729_jbc.M110.123729-1.pdf]

# Supplemental figure S2

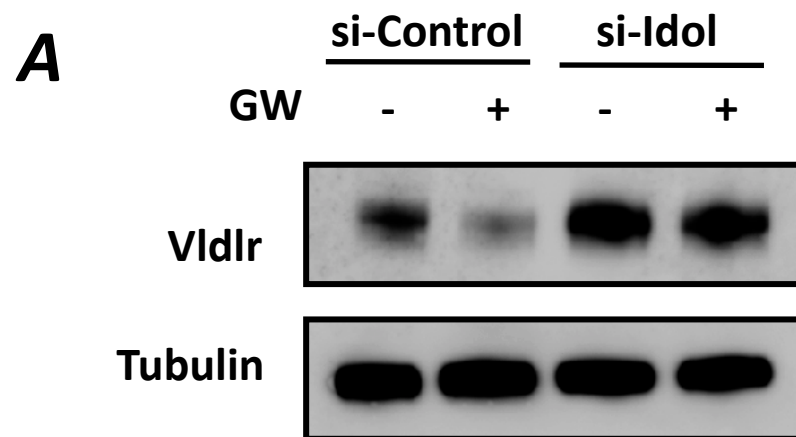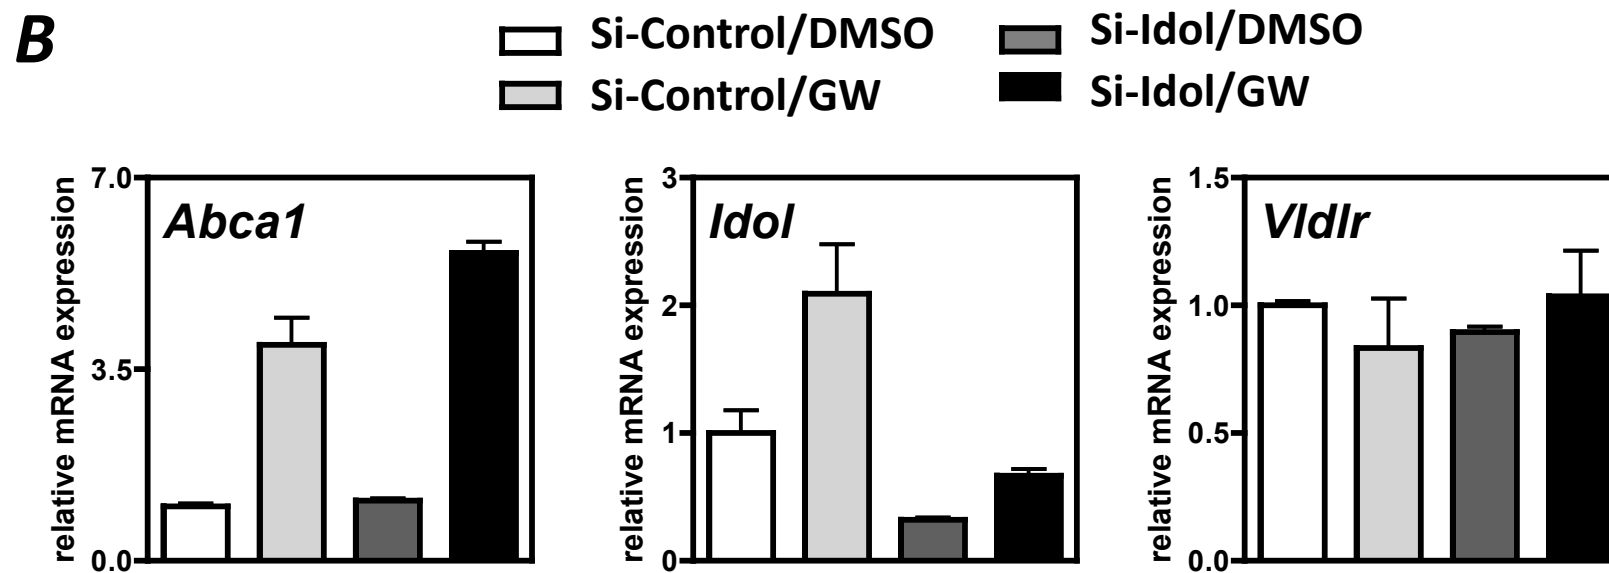

Supplement: supp_M110.123729_jbc.M110.123729-2.pdf [file supp_M110.123729_jbc.M110.123729-2.pdf]

# Supplemental figure S3

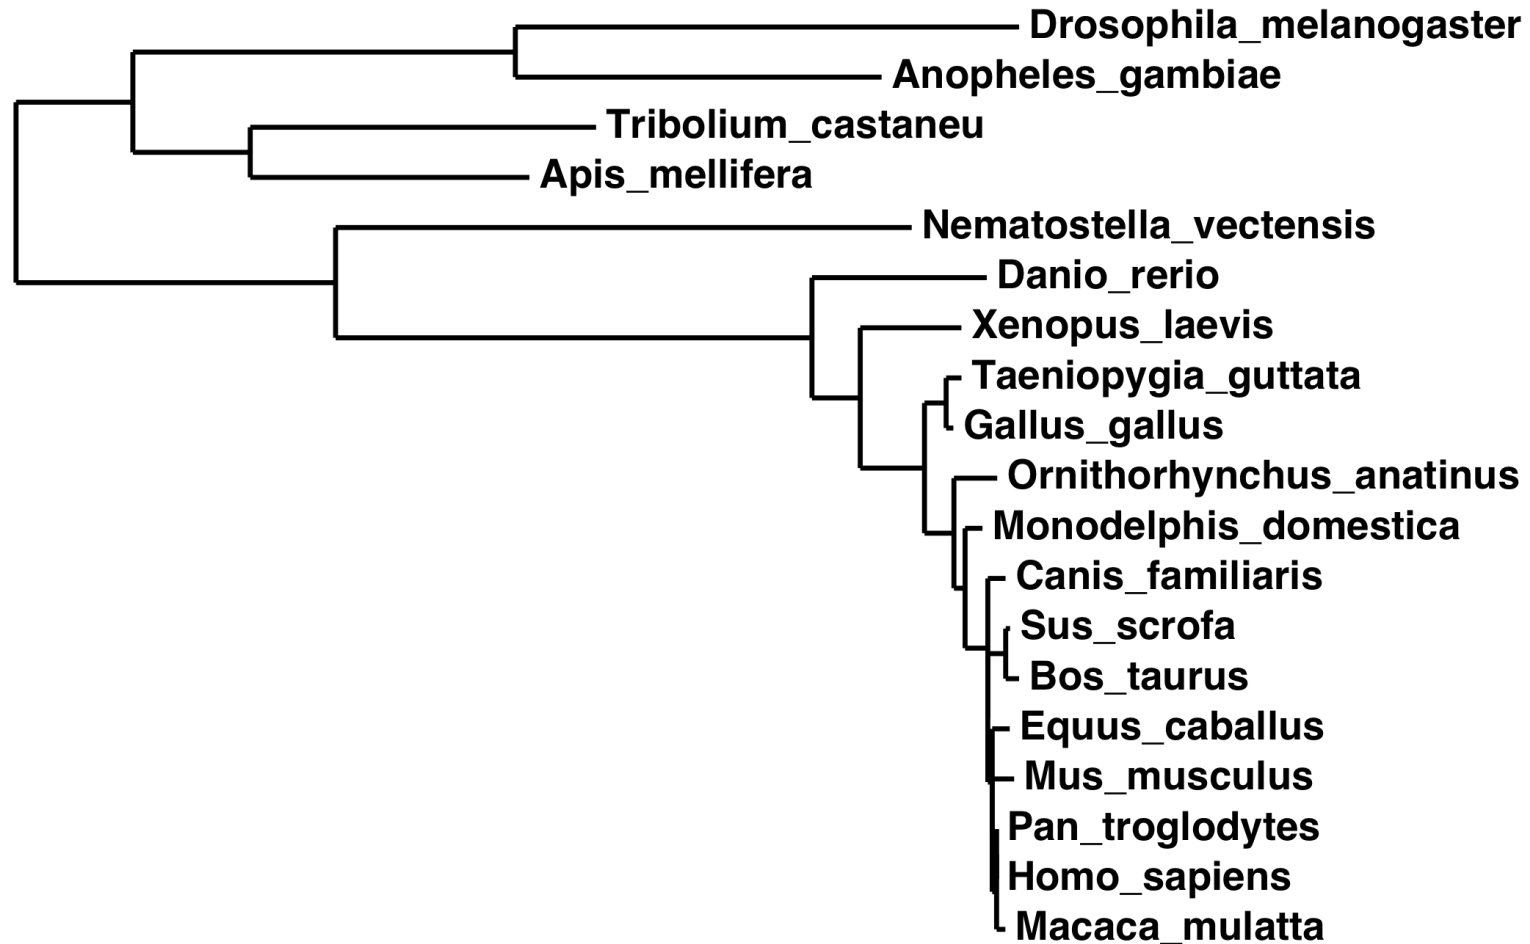

Supplement: supp_M110.123729_jbc.M110.123729-3.pdf [file supp_M110.123729_jbc.M110.123729-3.pdf]

# Supplemental figure S4

**A**

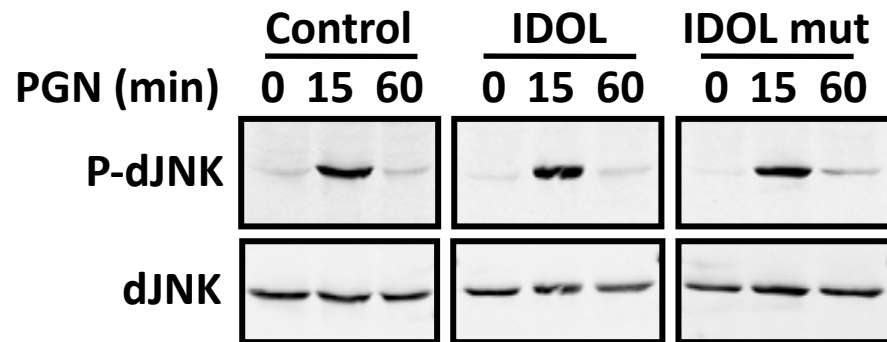

**B**

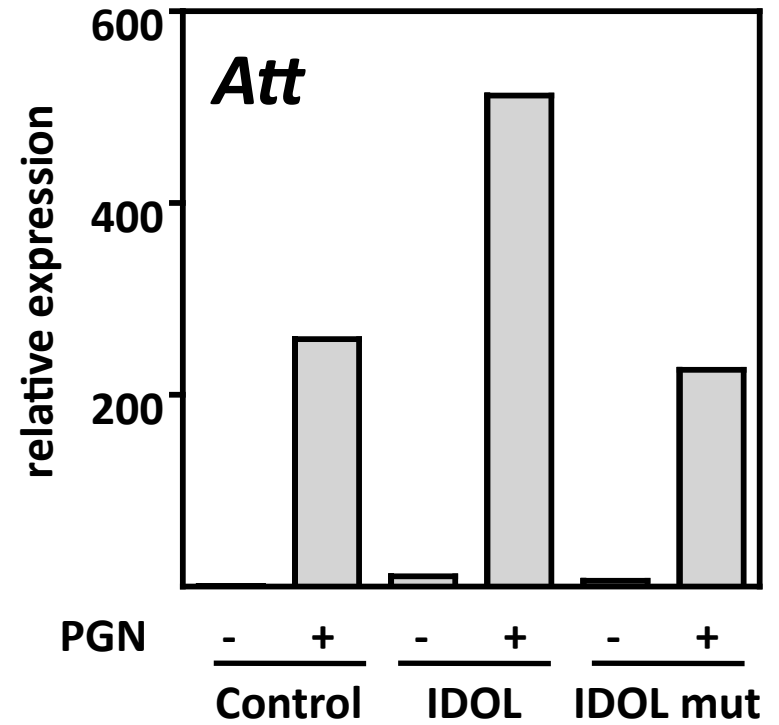

Supplement: supp_M110.123729_jbc.M110.123729-4.pdf [file supp_M110.123729_jbc.M110.123729-4.pdf]

# Supplemental figure S5

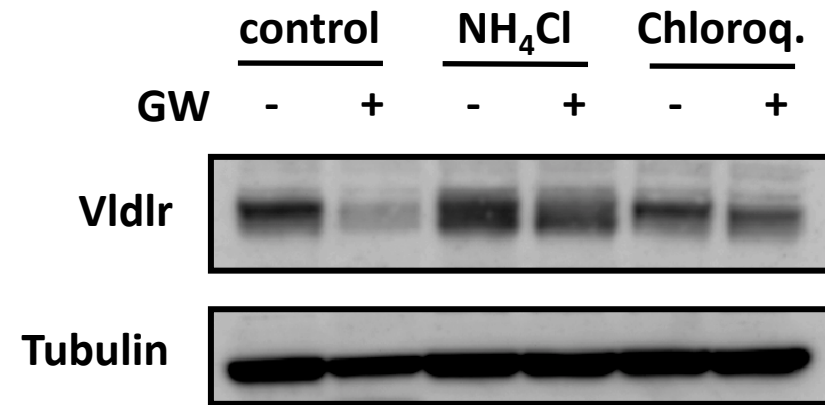

Supplement: supp_M110.123729_jbc.M110.123729-5.pdf [file supp_M110.123729_jbc.M110.123729-5.pdf]

# Supplemental figure S6

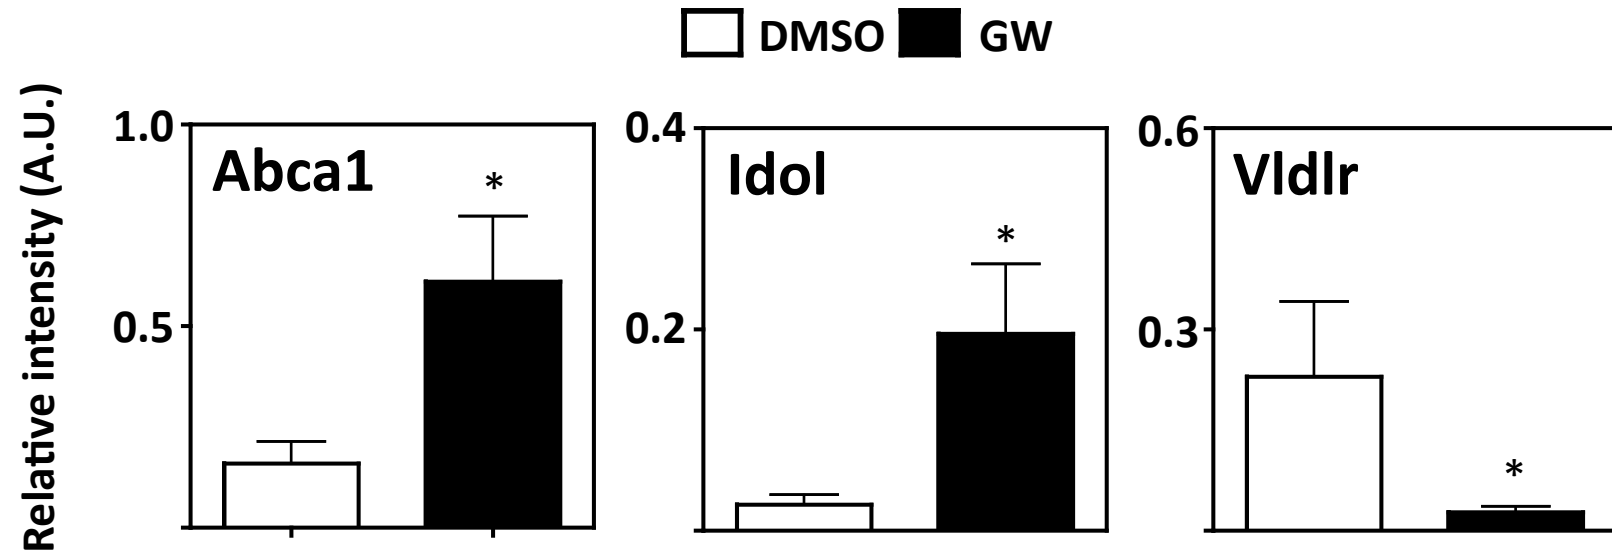

Supplement: supp_M110.123729_jbc.M110.123729-6.pdf [file supp_M110.123729_jbc.M110.123729-6.pdf]
